# Supplementary material
Source: Springer Nature journal article supplement (https://www.springermedizin.de/resource/supplementary/12879_2013_2421_MOESM4_ESM.pdf/9444532)

**M****1****2****3****4**

120kD —

80kD —

60kD —

40kD —

20kD —

← TgCPB

← TgCPL

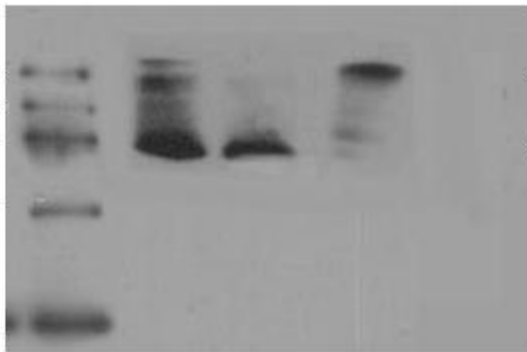

Supplement: MOESM4 [file 9444532]
